# Supplementary material for: Ordered mesoporous FeNx-doped carbon: a class of highly active and stable catalysts in acids, bases and polymer electrolyte membrane fuel cells
Source: Royal Society of Chemistry journal article supplement (doi:10.1039/c7ta10555j), 2018-01-01
Supplement: c7ta10555j1.pdf [file c7ta10555j1.pdf]

Electronic Supplemental Information

**Ordered Mesoporous FeN-Doped Carbon: A Class of Highly Active and Stable Catalysts in Acid, Base and Polymer Electrolyte Membrane Fuel Cells**

Rongzhong Jiang <sup>a</sup>, Dat T. Tran <sup>a</sup>, Joshua P. McClure <sup>a</sup>, David R. Baker <sup>a</sup>, Deryn Chu <sup>a</sup> and Scott D. Walck <sup>b</sup>

<sup>a</sup> Sensors and Electron Devices Directorate, U.S. Army Research Laboratory, 2800 Powder Mill Road, Adelphi, MD 20783-1197

<sup>b</sup> RDRL-WMM-C, U.S. Army Research Laboratory, Aberdeen Proving Ground, MD 21005

Email: [Rongzhong.jiang.civ@mail.mil](mailto:Rongzhong.jiang.civ@mail.mil), Phone: +1 301-394-0295, Fax: +1 301-394-0273

## Supplementary Tables

**Table S1.** Comparison of electrochemical performances of OMFENC and 40% Pt/C coated rotating disk electrodes in 0.5M H<sub>2</sub>SO<sub>4</sub>.

| Electrochemical Parameters                                                           | OMFeNC-800 | 40% Pt/C |
|--------------------------------------------------------------------------------------|------------|----------|
| E <sub>1/2</sub> (V vs. RHE)                                                         | 0.78       | 0.83     |
| Activity at 0.6V, 1600 rpm (mA/cm <sup>2</sup> )                                     | 5.5        | 5.4      |
| ORR Electron Number                                                                  | 4          | 4        |
| Kinetic Rate (K <sub>f</sub> ) at 0.6V (cm.S <sup>-1</sup> )                         | 0.10       | -        |
| Activity retention (I <sub>20</sub> /I <sub>0</sub> ) at 900 rpm after 20 hours test | 77.4%      | 69.5%    |

**Table S2.** Comparison of electrochemical performances of OMFENC and 40% Pt/C coated rotating disk electrodes in 0.1M KOH.

| Electrochemical Parameters                                                           | OMFeNC-800 | 40% Pt/C |
|--------------------------------------------------------------------------------------|------------|----------|
| E <sub>1/2</sub> (V vs. RHE)                                                         | 0.85       | 0.87     |
| Activity at 0.6V, 1600 rpm (mA/cm <sup>2</sup> )                                     | 6.0        | 6.0      |
| ORR Electron Number                                                                  | 4          | 4        |
| Kinetic rate (K <sub>f</sub> ) at 0.6V (cm.S <sup>-1</sup> )                         | 0.17       | -        |
| Activity retention (I <sub>20</sub> /I <sub>0</sub> ) at 900 rpm after 20 hours test | 93.5%      | 87.8     |

## Supplementary Figures

a.

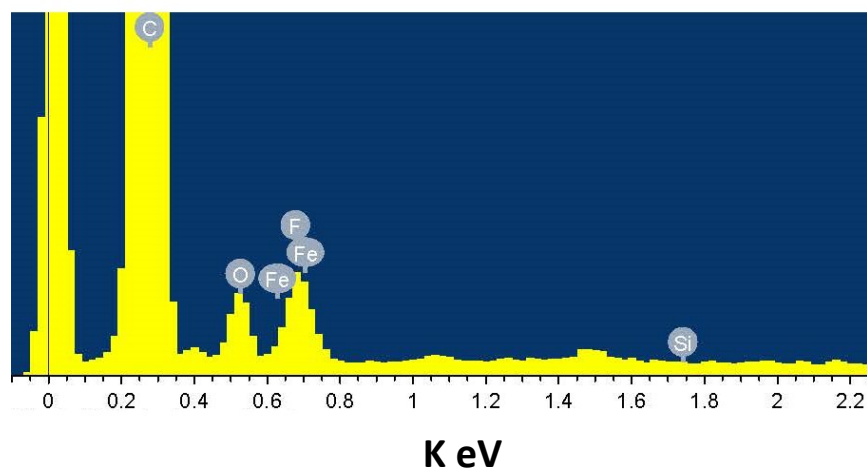

b.

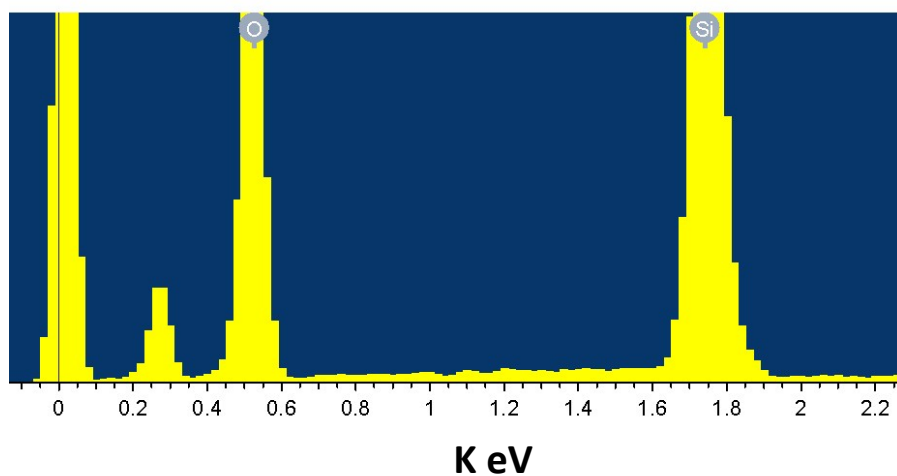

**Figure S1.** EDS spectra of OMFenC-800 prepared with HF-free method (a) and SBA-15 (b). There is no Si detected for the OMFenC 800 prepared with HF-free method.

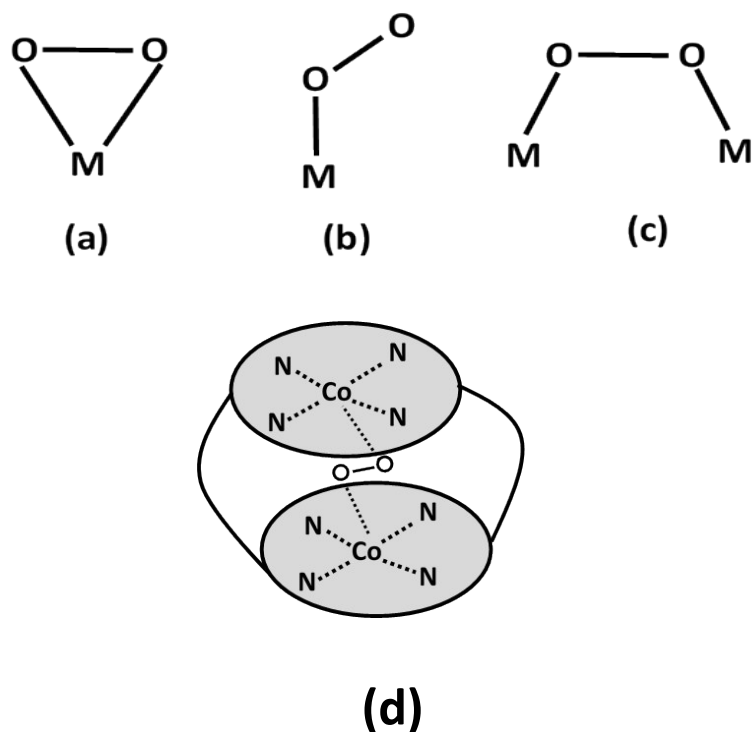

**Figure S2.** Schematic drawing of oxygen adsorption at transition metal surface with Griffiths model (a), Pauling model (b), and Bridge model (c) proposed by Yeager et al [1-4], and a face-to face cobalt porphyrin (d) for catalytic oxygen reduction synthesized by Collman and Anson et al [5-6].

## References:

1. Scherson, D. A.; Gupta, L. S.; Fierro, C.; Yeager, E. B.; Kordesch, M. E.; Eldridge, J.; Hoffman, R. W.; Blue, J. Cobalt Tetramethoxyphenyl Porphyrin—emission Mossbauer Spectroscopy and O<sub>2</sub> Reduction Electrochemical Studies. *Electrochim. Acta* 1983, 28, 1205–1209.
2. Scherson, D. A.; Tanaka, A. A.; Gupta, S. L.; Tryk, D.; Fierro, C.; Holze, R.; Yeager, E. B.; Lattimer, R. P. Transition Metal Macrocycles Supported on High Area Carbon: Pyrolysis—mass Spectrometry Studies. *Electrochim. Acta* 1986, 31, 1247–1258.
3. Yeager, E. B. Dioxygen Electrocatalysis: Mechanisms in Relation to Catalyst Structure. *J. Mol. Catal.* 1986, 38, 5–25.
4. Gupta, S.; Tryk, D.; Bae, I.; W. Aldred, W.; Yeager, E. B. Heat-treated polyacrylonitrile-based catalysts for oxygen electroreduction. *J. Appl. Electrochem.* 1989, 19, 19-27.
5. Collman, J. P.; Denisevich, P.; Konai, Y.; Marrocco, M.; Koval, C.; Anson, F. C. Electrode Catalysis of the Four-Electron Reduction of Oxygen to Water by Dicobalt Face-to-Face Porphyrins. *J. Am. Chem. Soc.* 1980, 102, 6027–6036.
6. Collman, J. P.; Anson, F. C.; Barnes, C. E.; Bencosme, C. S.; Geiger, T.; Evitt, E. R.; Kreh, R. P.; Meier, K.; Pettman, R. B. Further Studies of the Dimeric  $\beta$ - Linked “face-to-Face Four” porphyrin: FTF4. *J. Am. Chem. Soc.* 1983, 105, 2694–2699.

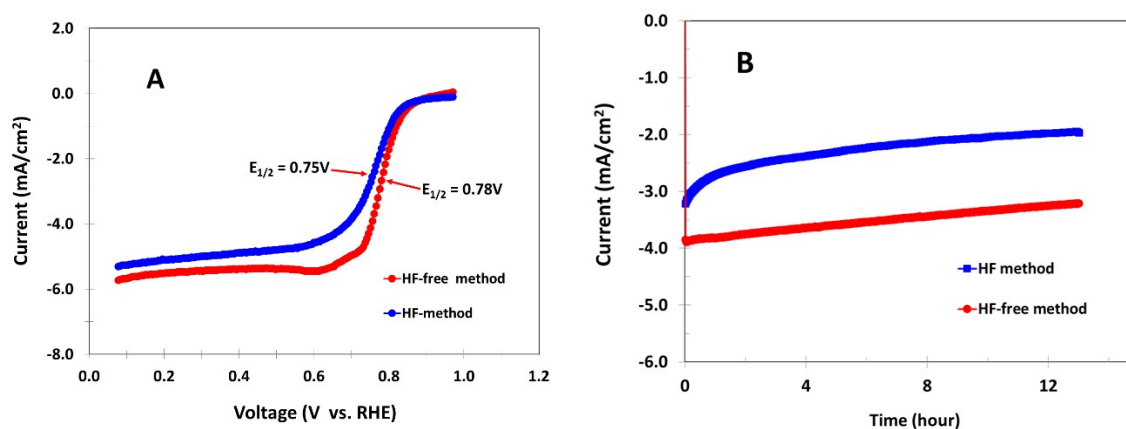

**Figure S3.** Catalytic activity and stability of OMFenC-800. (A) Polarization curves of OMFenC-800 coated rotating disk electrodes, 10 mv/s, 1600 rpm. (B) Chronoamperometric curves of OMFenC-800 coated rotating disk electrode at 0.6V, 900 rpm. The OMFenCs were made with HF-method and HF-free method, respectively. Catalyst loading: 0.4 mg/cm<sup>2</sup>. Electrolyte: O<sub>2</sub> saturated 0.5M H<sub>2</sub>SO<sub>4</sub> solution.

The polarization curves shown in Figure S3-A indicates that the half wave potential of the OMFenC made with HF-free method is 30 mV higher than that with HF-method for catalytic ORR in O<sub>2</sub> saturated 0.5M H<sub>2</sub>SO<sub>4</sub>. The average limiting current of OMFenC is also increased by ~15% from HF-method to HF-free method. The durability test results are shown in Figure S3-B. The chronoamperometric curve of the OMFenC made with HF-free method is much more stable, having ~25% higher current density than that with HF method for entire range of the experiment.

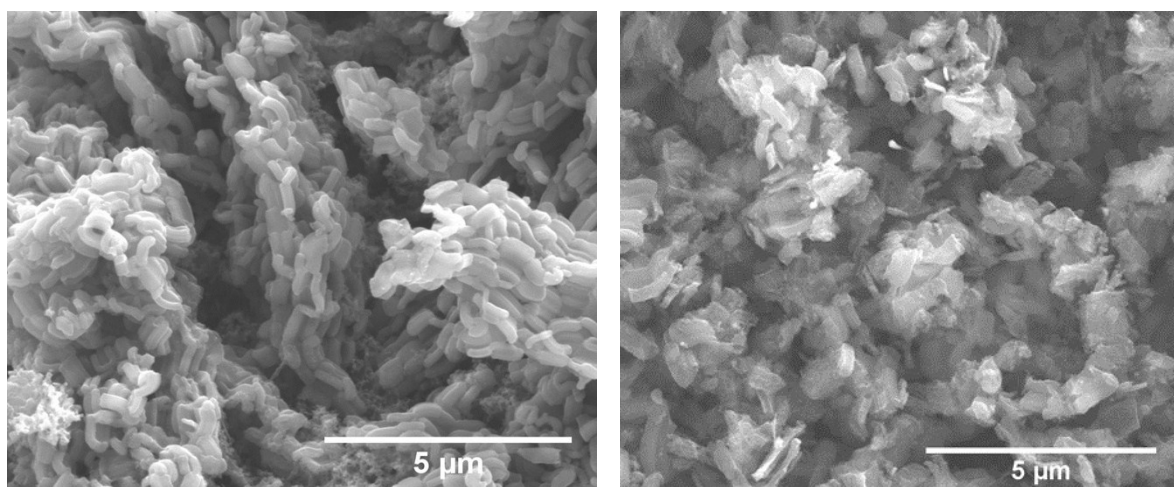

**Figure S4.** SEM images of OMFenC-800 made with HF-free method (A) and HF-method, respectively.

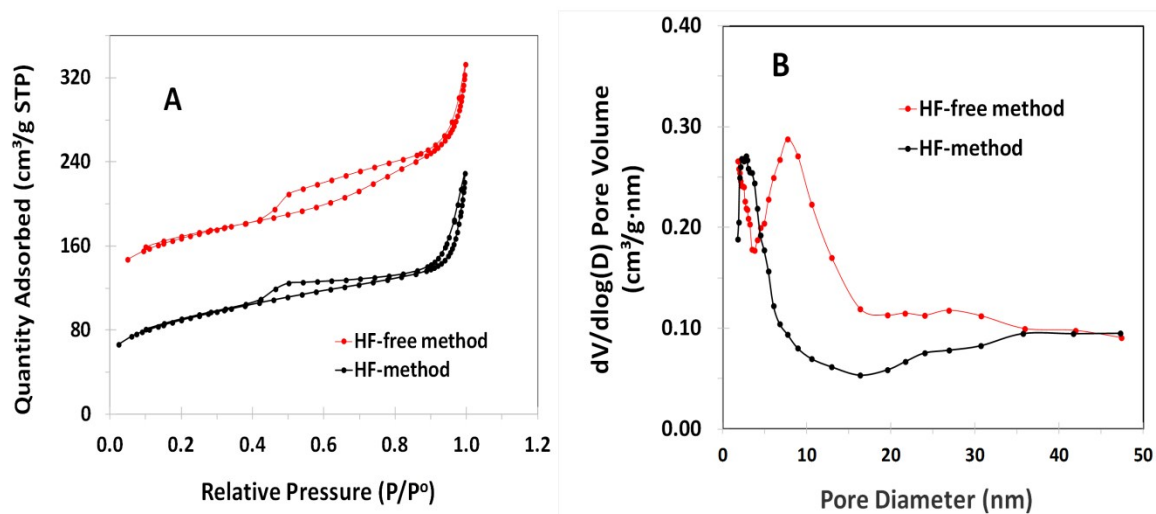

**Figure S5.** (A)  $\text{N}_2$  adsorption-desorption isotherm of OMFenC obtained by HF-free method and HF-method. (B) pore size distribution of OMFenC obtained by HF-free method and HF-method.

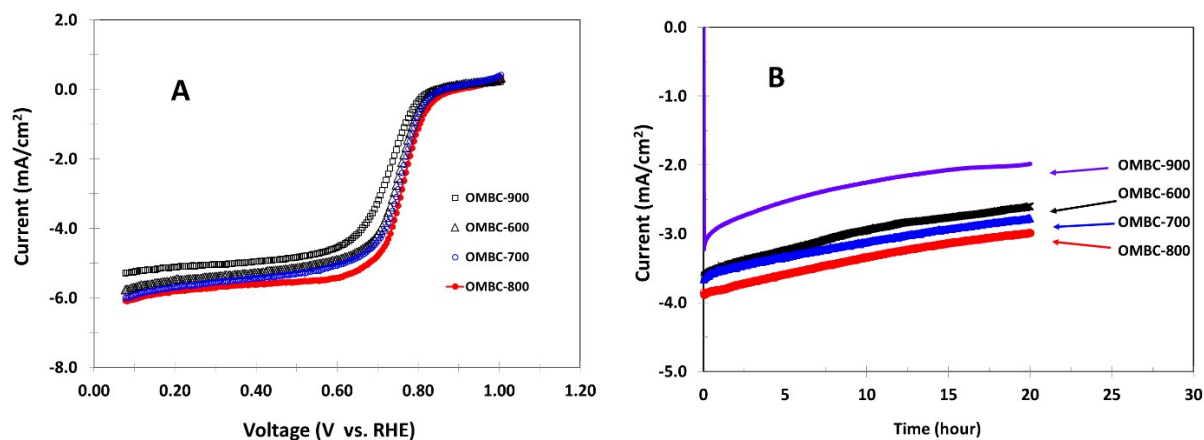

**Figure S6.** . Electrocatalytic activity and stability of OMFenC made by HF-free method at different temperatures (A) Polarization curves of OMFenC coated rotating disk electrodes, 10 mv/s, 1600 rpm. (B) Chronoamperometric curves of OMFenC coated rotating disk electrode at 0.6V, 900 rpm, respectively. Catalyst loading: 0.4 mg/cm<sup>2</sup>. Electrolyte: O<sub>2</sub> saturated 0.5M H<sub>2</sub>SO<sub>4</sub>.

A minimum temperature is required to completely carbonize hemin and decompose Teflon for make OMFenC. Therefore, we started from 600°C to pyrolyze the mixture of hemin and Teflon. The activity and stability of OMFenC for catalytic ORR is varying with heat-treating temperature. As shown in Figure S5-A, the OMFenC's activity for catalytic ORR increases from 600 to 800°C heat-treatment. The corresponding half wave potential and limiting current increase are seen. When we increased temperature to 900°C for pyrolysis, the OMFenC's activity is decreased. The durability test results of OMFenC for catalytic ORR at 900 rpm in O<sub>2</sub> saturated 0.5M H<sub>2</sub>SO<sub>4</sub> are shown in Figure S5-B. The OMFenC-800 has the highest current density for the entire test range by 20 hours test.
